# Supplementary material for: Heterogeneity in the entire genome for three genotypes of peach [Prunus persica (L.) Batsch] as distinguished from sequence analysis of genomic variants
Source: PubMed Central journal article supplement (PMC4046826; doi:10.1186/1471-2164-14-750), 2013-11-01
Supplement: 12864_2013_5471_MOESM1_ESM.pdf [file 12864_2013_5471_MOESM1_ESM.pdf]

# SnpEff: Variant analysis

Contents

- Summary
- Change rate details
- Number changes by type
- Number of effects by impact
- Number of effects by functional class
- Missense / Silent ratio: 1.5262
- Number of effects by type and region

## Summary

|                                                                   |                                                                                           |
|-------------------------------------------------------------------|-------------------------------------------------------------------------------------------|
| Genome                                                            | pppnc139                                                                                  |
| Date                                                              | 2012-09-03 21:34                                                                          |
| SnpEff version                                                    | SnpEff 3.0c (build 2012-07-19), by Pablo Cispedal                                         |
| Command line arguments                                            | SnpEff pppnc139 -i ref /Volumes/USB_DISK/VCF4/00_vcf -r /Volumes/USB_DISK/VCF4/00_mask -v |
| Warnings                                                          | 0                                                                                         |
| Number of lines (input file)                                      | 395,433                                                                                   |
| Number of variants (before filter)                                | 399,649                                                                                   |
| Filter                                                            |                                                                                           |
| Number of variants filtered out                                   | 0                                                                                         |
| Number of not variants (i.e. reference equals alternative)        | 0                                                                                         |
| Number of variants processed (i.e. after filter and non-variants) | 399,649                                                                                   |
| Number of known variants (i.e. non-empty ID)                      | 0 (0%)                                                                                    |
| Number of effects                                                 | 630,488                                                                                   |
| Genome total length                                               | 227,252,108                                                                               |
| Genome effective length                                           | 227,128,408                                                                               |
| Change rate                                                       | 1 change every 568 bases                                                                  |

## Change rate details

| Chromosome | Length      | Changes | Change rate |
|------------|-------------|---------|-------------|
| 1          | 45,877,626  | 89,337  | 524         |
| 2          | 28,807,724  | 87,058  | 307         |
| 3          | 22,028,950  | 21,520  | 1,023       |
| 4          | 30,528,727  | 60,371  | 504         |
| 5          | 18,502,877  | 33,854  | 545         |
| 6          | 28,902,262  | 32,718  | 881         |
| 7          | 22,795,183  | 58,020  | 392         |
| 8          | 21,829,783  | 17,208  | 1,288       |
| Total      | 227,128,408 | 399,649 | 568         |

## Number changes by type

| Type     | Total   | Ratio  | Ratio   |
|----------|---------|--------|---------|
| SNP      | 326,646 | 1,000  | 172,227 |
| SNP      | 0       | 0      | 0       |
| INS      | 10,148  | 4,734  | 15,382  |
| DEL      | 21,858  | 2,048  | 14,958  |
| MIXED    | 0       | 0      | 0       |
| Interval | 0       | 0      | 0       |
| Total    | 399,649 | 16,179 | 184,479 |

## Number of effects by impact

| Type (alphabetical order) | Count   | Percent |
|---------------------------|---------|---------|
| HIGH                      | 1,687   | 0.266%  |
| LOW                       | 10,404  | 1.65%   |
| MODERATE                  | 15,797  | 2.505%  |
| MODIFIER                  | 462,599 | 73.579% |

## Number of effects by functional class

| Type (alphabetical order) | Count  | Percent |
|---------------------------|--------|---------|
| MISSENSE                  | 15,813 | 2.508%  |
| NONSENSE                  | 491    | 0.078%  |
| SILENT                    | 19,628 | 3.11%   |

Missense / Silent ratio: 1.5262

## Number of effects by type and region

| Type (alphabetical order)         | Count   | Percent | Region (alphabetical order) | Count   | Percent |
|-----------------------------------|---------|---------|-----------------------------|---------|---------|
| CODON_CHANGE_PLUS_CODON_DELETION  | 84      | 0.013%  | DOWNSTREAM                  | 250,787 | 39.78%  |
| CODON_CHANGE_PLUS_CODON_INSERTION | 79      | 0.012%  | EXON                        | 21,408  | 3.403%  |
| CODON_DELETION                    | 82      | 0.013%  | INTERGENIC                  | 108,303 | 17.176% |
| CODON_INSERTION                   | 35      | 0.005%  | INTRON                      | 47,807  | 7.582%  |
| DOWNSTREAM                        | 250,787 | 39.78%  | INTRON                      | 47,807  | 7.582%  |
| FRAME_SHIFT                       | 941     | 0.148%  | SPLICE_SITE_ACCEPTOR        | 131     | 0.021%  |
| INTERGENIC                        | 108,303 | 17.176% | SPLICE_SITE_DONOR           | 134     | 0.021%  |
| INTRON                            | 47,807  | 7.582%  | UPSTREAM                    | 19,628  | 3.11%   |
| NON_SYNONYMOUS_CODING             | 15,813  | 2.508%  | UTR_3_PRIME                 | 424     | 0.067%  |
| NON_SYNONYMOUS_START              | 2       | 0%      | UTR_5_PRIME                 | 1,054   | 0.166%  |
| SPLICE_SITE_ACCEPTOR              | 131     | 0.021%  |                             |         |         |
| SPLICE_SITE_DONOR                 | 134     | 0.021%  |                             |         |         |
| START_GAINED                      | 196     | 0.031%  |                             |         |         |
| START_LOST                        | 35      | 0.005%  |                             |         |         |
| STOP_GAINED                       | 498     | 0.078%  |                             |         |         |
| STOP_LOST                         | 45      | 0.007%  |                             |         |         |
| SYNONYMOUS_CODING                 | 10,817  | 1.65%   |                             |         |         |
| SYNONYMOUS_STOP                   | 19      | 0.003%  |                             |         |         |
| UPSTREAM                          | 19,628  | 3.11%   |                             |         |         |
| UTR_3_PRIME                       | 424     | 0.067%  |                             |         |         |
| UTR_5_PRIME                       | 1,054   | 0.166%  |                             |         |         |

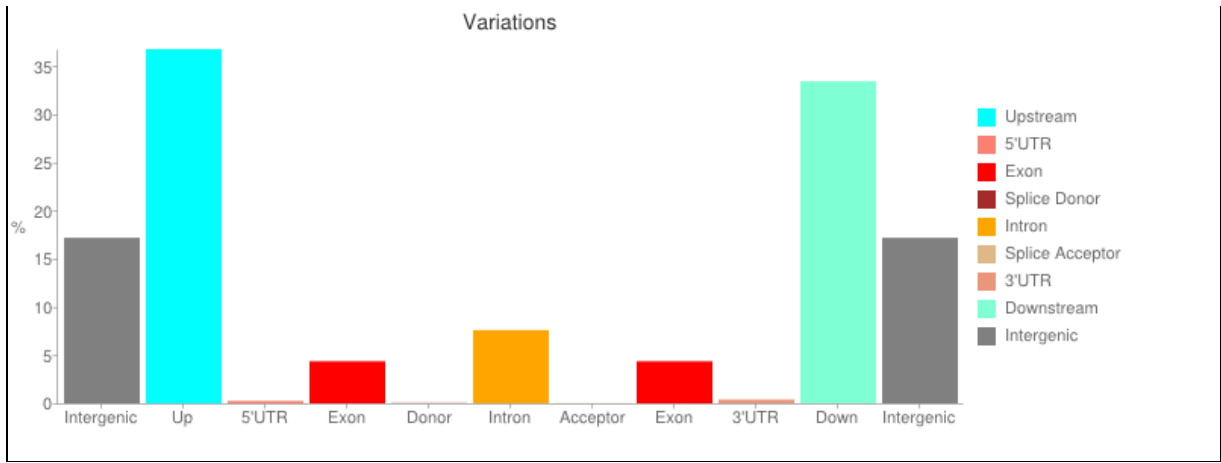

### Quality:

|                    |        |
|--------------------|--------|
| Min                | 3      |
| Max                | 227    |
| Mean               | 46.614 |
| Median             | 75     |
| Standard deviation | 63.136 |

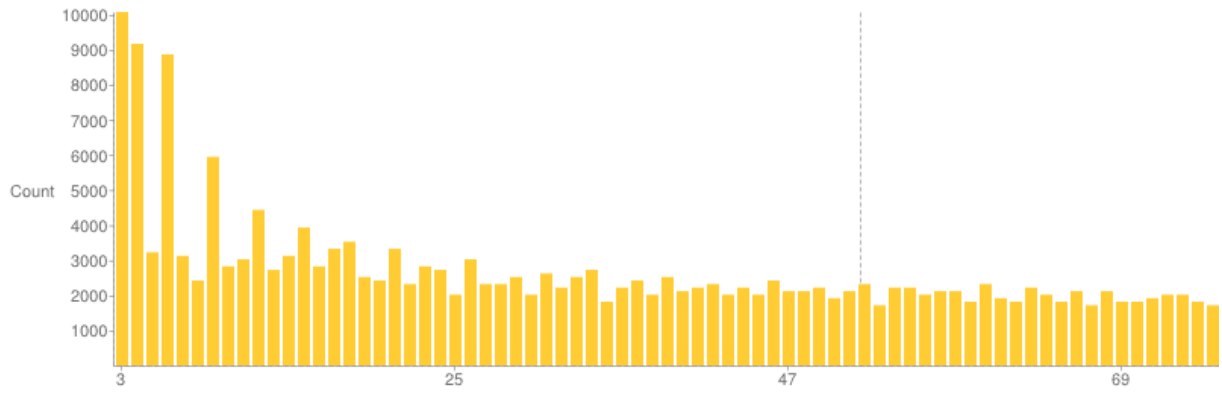

### Coverage:

|                    |        |
|--------------------|--------|
| Min                | 1      |
| Max                | 2,887  |
| Mean               | 15,504 |
| Median             | 13     |
| Standard deviation | 22,705 |

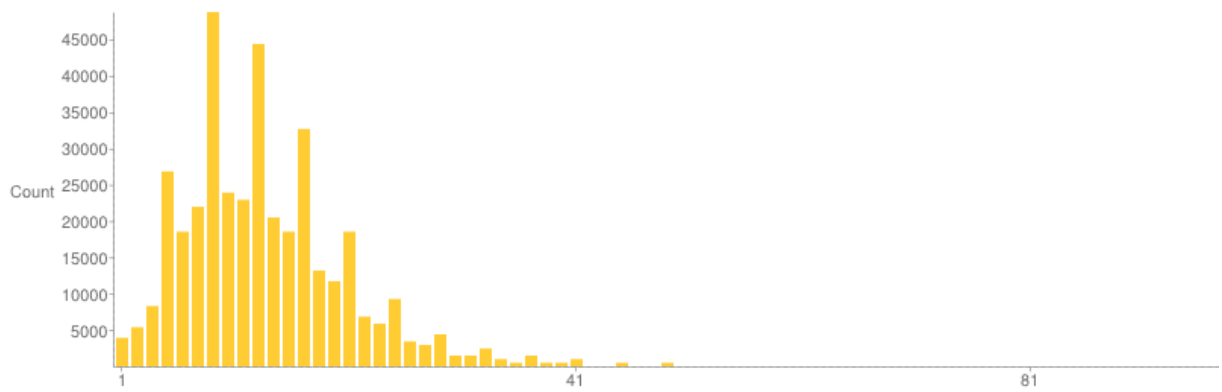

### Insertions and deletions length:

|                    |        |
|--------------------|--------|
| Min                | -49    |
| Max                | 42     |
| Mean               | -0.528 |
| Median             | -1     |
| Standard deviation | 5.131  |

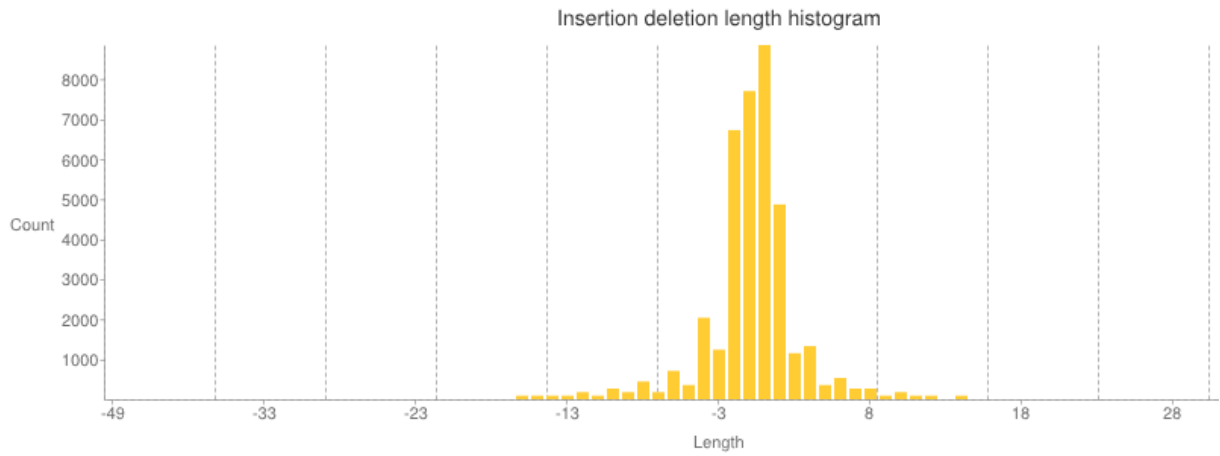

### Base changes (SNPs)

|   | A    | C    | G    | T    |
|---|------|------|------|------|
| A | 0    | 1752 | 2272 | 2128 |
| C | 1752 | 0    | 1752 | 2272 |
| G | 2272 | 1752 | 0    | 1752 |
| T | 2128 | 2272 | 1752 | 0    |

### Ts/Tv (transitions / transversions)

**Note:** Only SNPs are used for this statistic.

**Note:** This Ts/Tv ratio is a 'raw' ratio. Some people prefer to use a ratio of rates, not observed events. In that case, you need to multiply by 2.0 (since there are twice as many possible transitions than transversions, E[Ts/Tv] ratio is twice the ratio of events).

|               |        |
|---------------|--------|
| Transitions   | 227722 |
| Transversions | 130402 |
| Ts/Tv ratio   | 1.746  |

#### All variants:

Sample : pp Total  
 Transitions : 227723 227723  
 Transversions : 130402 130402  
 Ts/Tv : 1.746 1.746

#### Only known variants (i.e. the ones having a non-empty ID field):

No results available (empty input?)

### Frequency of alleles

Note: Number of times an allele appears once (singleton), twice (doubletons), etc.

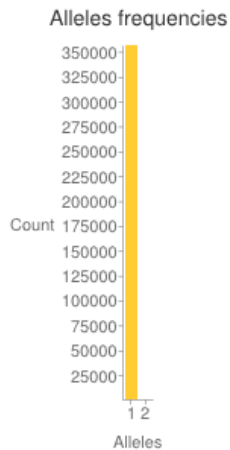

#### All variants:

|        |       |
|--------|-------|
| Min    | 1     |
| Max    | 2     |
| Mean   | 1.022 |
| Median | 1     |

|                    |          |
|--------------------|----------|
| Standard deviation | 0.045    |
| Values             | 12       |
| Count              | 39681732 |

Only known variants (i.e. the ones having a non-empty ID field):

|                    |            |
|--------------------|------------|
| Min                | 2147483347 |
| Max                | 2147483348 |
| Mean               | 0          |
| Median             | 0          |
| Standard deviation | 0          |
| Values             |            |
| Count              |            |

### Codon changes

How to read this table:

- Rows are reference codons and columns are changed codons. E.g. Row 'AAA' column 'TAA' indicates how many 'AAA' codons have been replaced by 'TAA' codons.
- Red background colors indicate that more changes happened (heat-map).
- Diagonals are indicated using grey background color
- WARNING: This table may include different translation codon tables (e.g. mamalian DNA and mitochondrial DNA).

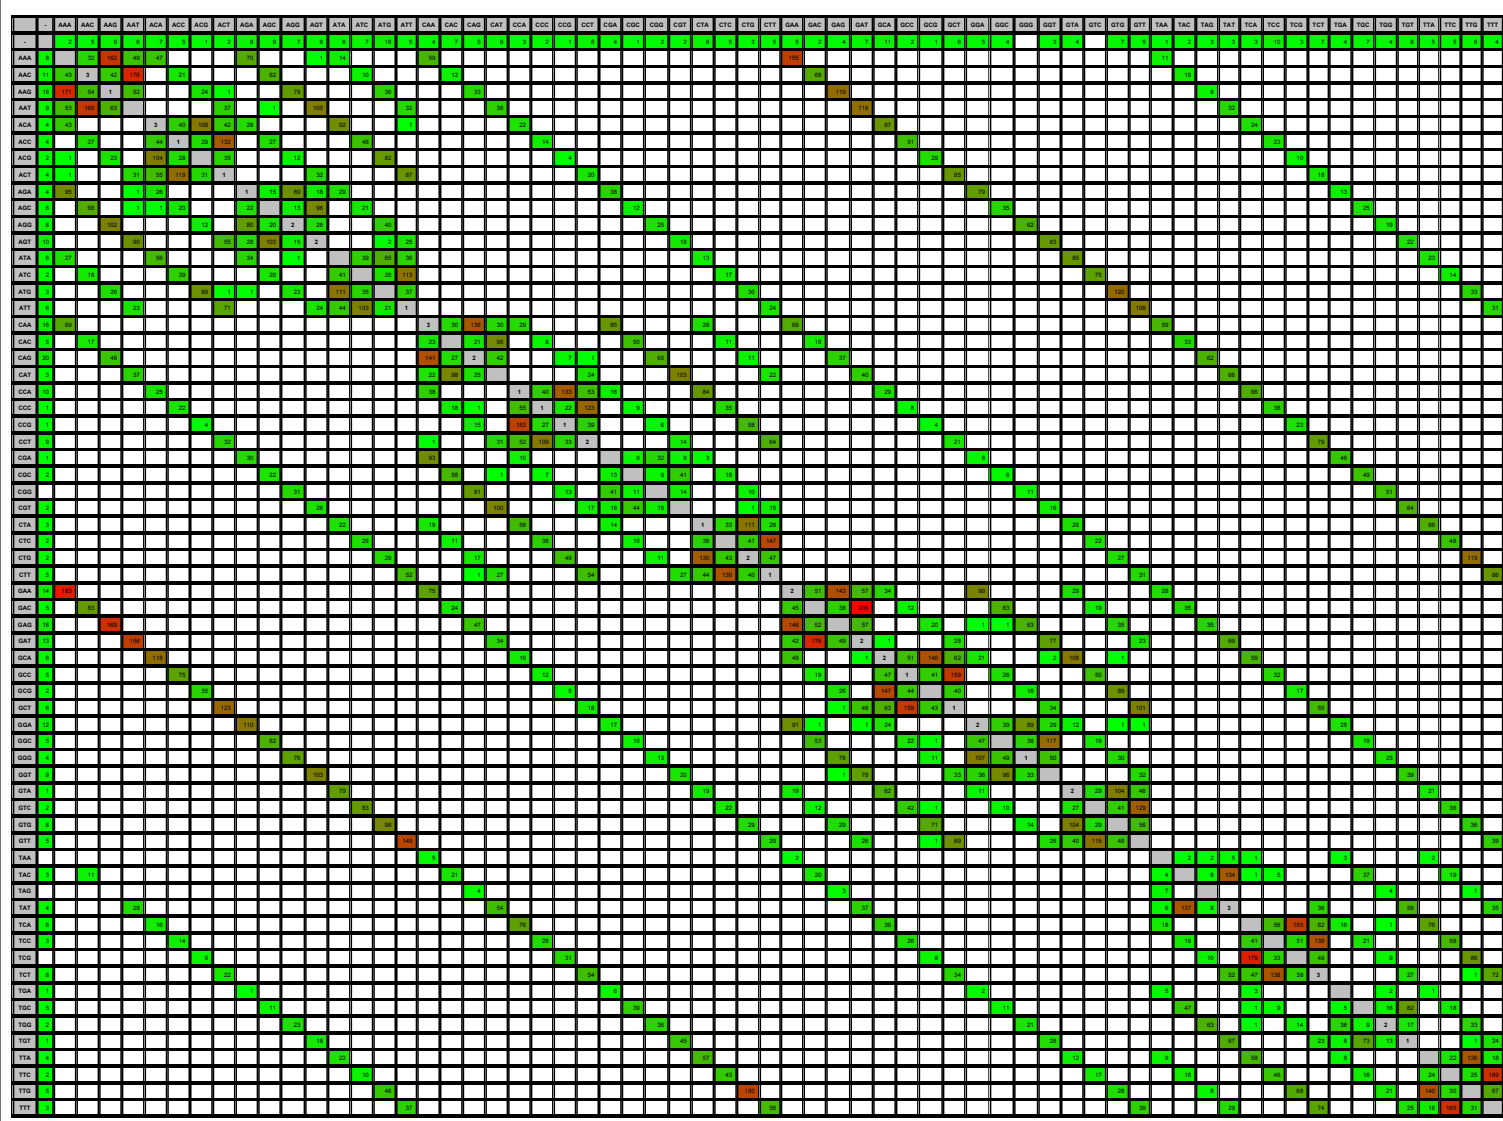

### Amino acid changes

How to read this table:

- Rows are reference amino acids and columns are changed amino acids. E.g. Row 'A' column 'E' indicates how many 'A' amino acids have been replaced by 'E' amino acids.
- Red background colors indicate that more changes happened (heat-map).
- Diagonals are indicated using grey background color
- WARNING: This table may include different translation codon tables (e.g. mamalian DNA and mitochondrial DNA).

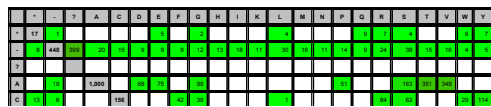



Changes histogram: 3

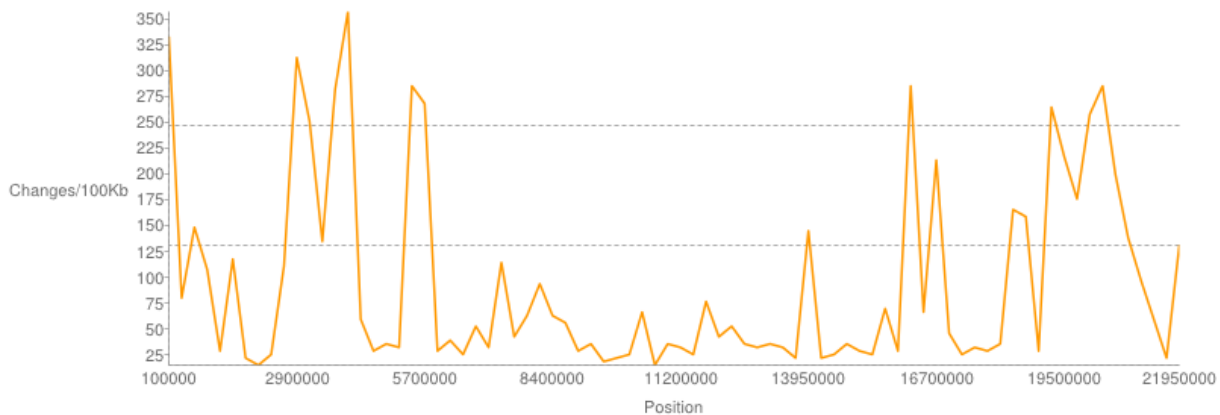

Chromosome: 3

Changes histogram: 4

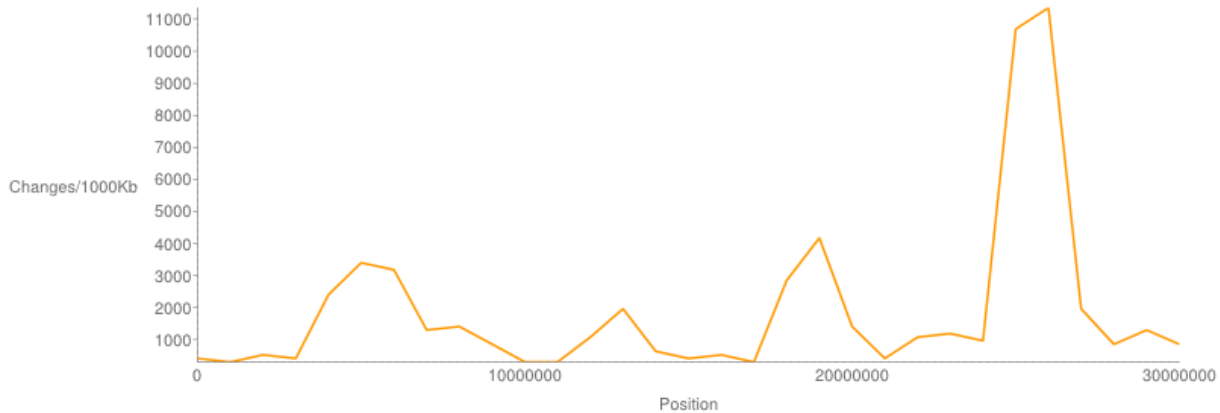

Chromosome: 4

Changes histogram: 5

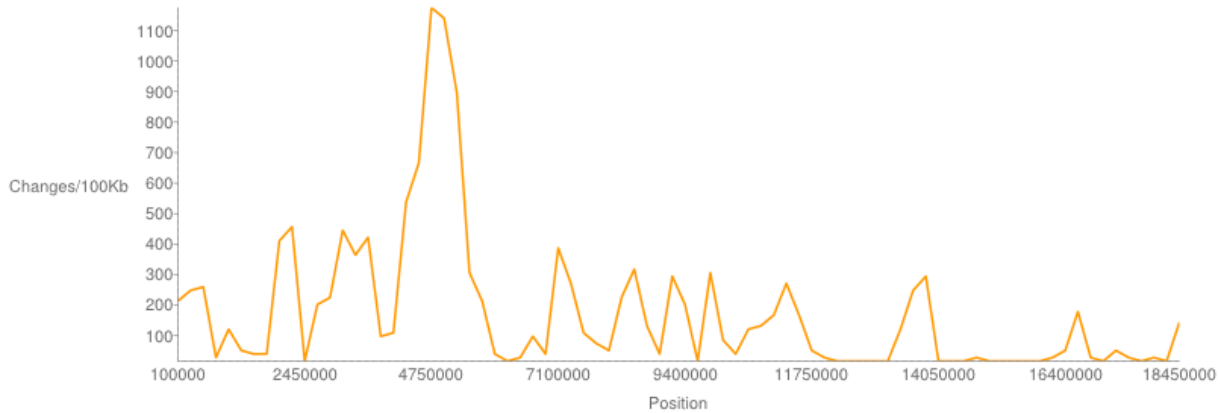

Chromosome: 5

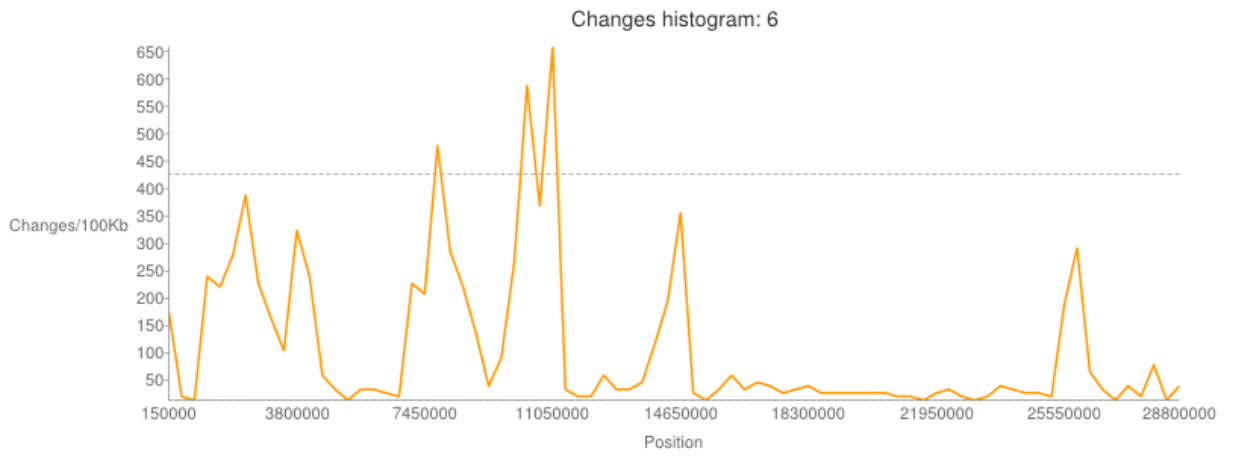

Chromosome: 6

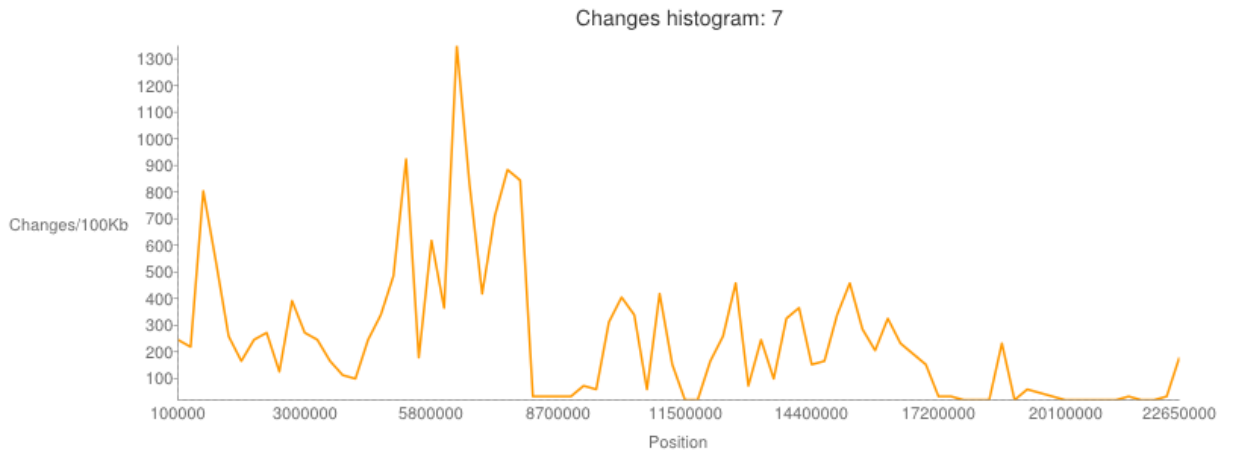

Chromosome: 7

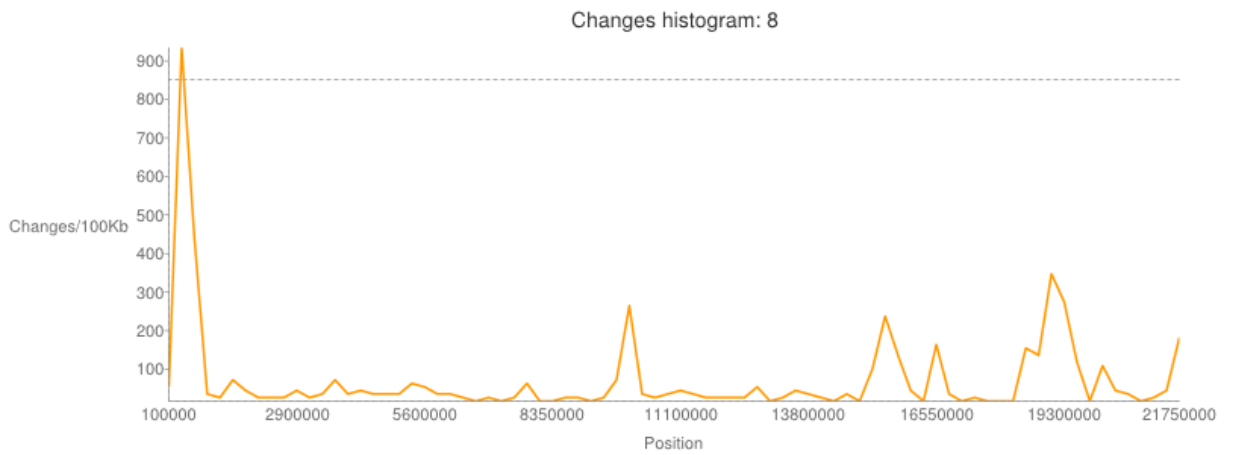

Chromosome: 8

**Details by gene**

[Here](#) you can find a tab-separated table.
