# Supplementary material for: Heterogeneity in the entire genome for three genotypes of peach [Prunus persica (L.) Batsch] as distinguished from sequence analysis of genomic variants
Source: PubMed Central journal article supplement (PMC4046826; doi:10.1186/1471-2164-14-750), 2013-11-01
Supplement: 12864_2013_5471_MOESM3_ESM.pdf [file 12864_2013_5471_MOESM3_ESM.pdf]

# SnpEff: Variant analysis

Contents

- Summary
- Change rate details
- Number changes by type
- Number of effects by impact
- Number of effects by functional class
- Missense / Silent ratio: 1.4481
- Number of effects by type and region

## Summary

|                                                                   |                                                                                             |
|-------------------------------------------------------------------|---------------------------------------------------------------------------------------------|
| Genome                                                            | pppncal39                                                                                   |
| Date                                                              | 2012-09-03 21:28                                                                            |
| SnpEff version                                                    | SnpEff 3.0c (build 2012-07-19), by Pablo Cingolani                                          |
| Command line arguments                                            | SnpEff pppncal39 -i /VCF /Volumes/USB_DISK/VCF4/GR_VCF -r /Volumes/USB_DISK/VCF4/GR_mask -v |
| Warnings                                                          | 0                                                                                           |
| Number of lines (input file)                                      | 633,812                                                                                     |
| Number of variants (before filter)                                | 639,062                                                                                     |
| Filter                                                            |                                                                                             |
| Number of variants filtered out                                   | 0                                                                                           |
| Number of not variants (i.e. reference equals alternative)        | 0                                                                                           |
| Number of variants processed (i.e. after filter and non-variants) | 639,062                                                                                     |
| Number of known variants (i.e. non-empty ID)                      | 0 (0%)                                                                                      |
| Number of effects                                                 | 1,028,718                                                                                   |
| Genome total length                                               | 227,252,108                                                                                 |
| Genome effective length                                           | 227,156,785                                                                                 |
| Change rate                                                       | 1 change every 355 bases                                                                    |

## Change rate details

| Chromosome | Length      | Changes | Change rate |
|------------|-------------|---------|-------------|
| 1          | 45,877,626  | 101,258 | 462         |
| 2          | 28,807,724  | 113,949 | 238         |
| 3          | 22,028,550  | 69,178  | 366         |
| 4          | 36,528,727  | 92,257  | 336         |
| 5          | 18,502,877  | 49,814  | 370         |
| 6          | 28,902,262  | 81,503  | 354         |
| 7          | 22,795,183  | 56,588  | 402         |
| 8          | 21,829,783  | 48,275  | 482         |
| Total      | 227,156,785 | 639,062 | 355         |

## Number changes by type

| Type  | Total   | Ratio  | Ratio  |
|-------|---------|--------|--------|
| SNP   | 541,876 | 84.8%  | 84.8%  |
| INS   | 0       | 0%     | 0%     |
| DEL   | 20,535  | 3.2%   | 3.2%   |
| MIXED | 0       | 0%     | 0%     |
| INDEL | 0       | 0%     | 0%     |
| Total | 639,062 | 100.0% | 100.0% |

## Number of effects by impact

| Type (alphabetical order) | Count   | Percent |
|---------------------------|---------|---------|
| HIGH                      | 2,007   | 0.20%   |
| LOW                       | 18,502  | 1.80%   |
| MODERATE                  | 35,028  | 3.41%   |
| MODIFIER                  | 952,881 | 92.59%  |

## Number of effects by functional class

| Type (alphabetical order) | Count   | Percent |
|---------------------------|---------|---------|
| MISSENSE                  | 25,120  | 2.45%   |
| NONSENSE                  | 819     | 0.08%   |
| SILENT                    | 926,942 | 90.47%  |

Missense / Silent ratio: 1.4481

## Number of effects by type and region

| Type (alphabetical order)         | Count     | Percent | Region (alphabetical order) | Count     | Percent |
|-----------------------------------|-----------|---------|-----------------------------|-----------|---------|
| CODON_CHANGE_PLUS_CODON_DELETION  | 98        | 0.01%   | DOWNSTREAM                  | 35,095    | 3.41%   |
| CODON_CHANGE_PLUS_CODON_INSERTION | 128       | 0.01%   | EXON                        | 45,048    | 4.40%   |
| CODON_DELETION                    | 143       | 0.01%   | INTERGENIC                  | 162,880   | 15.83%  |
| CODON_INSERTION                   | 98        | 0.01%   | INTRON                      | 79,877    | 7.76%   |
| DOWNSTREAM                        | 35,095    | 3.41%   | INTRON                      | 79,877    | 7.76%   |
| FRAME_SHIFT                       | 1,174     | 0.11%   | SPLICE_SITE_ACCEPTOR        | 191       | 0.01%   |
| INTERGENIC                        | 162,880   | 15.83%  | SPLICE_SITE_DONOR           | 191       | 0.01%   |
| INTRON                            | 79,877    | 7.76%   | UPSTREAM                    | 1,028,718 | 100.00% |
| NON_SYNONYMOUS_CODING             | 25,939    | 2.53%   | UTR_3_PRIME                 | 1,981     | 0.19%   |
| NON_SYNONYMOUS_START              | 6         | 0.00%   | UTR_5_PRIME                 | 2,198     | 0.21%   |
| SPLICE_SITE_ACCEPTOR              | 191       | 0.01%   |                             |           |         |
| SPLICE_SITE_DONOR                 | 191       | 0.01%   |                             |           |         |
| START_GAINED                      | 298       | 0.03%   |                             |           |         |
| START_LOST                        | 49        | 0.00%   |                             |           |         |
| STOP_GAINED                       | 638       | 0.06%   |                             |           |         |
| STOP_LOST                         | 75        | 0.00%   |                             |           |         |
| SYNONYMOUS_CODING                 | 17,742    | 1.72%   |                             |           |         |
| SYNONYMOUS_STOP                   | 28        | 0.00%   |                             |           |         |
| UPSTREAM                          | 1,028,718 | 100.00% |                             |           |         |
| UTR_3_PRIME                       | 1,981     | 0.19%   |                             |           |         |
| UTR_5_PRIME                       | 2,198     | 0.21%   |                             |           |         |

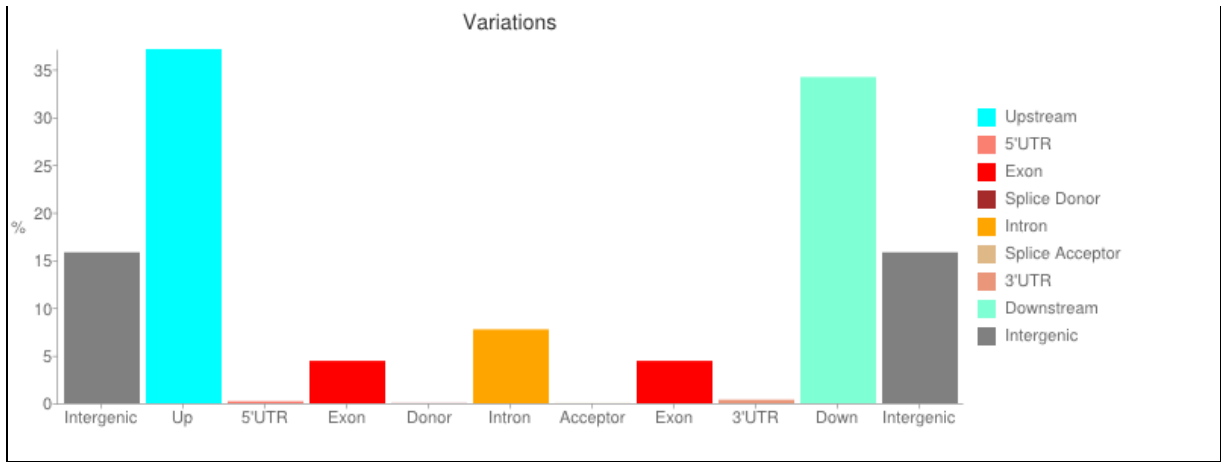

### Quality:

|                    |        |
|--------------------|--------|
| Min                | 3      |
| Max                | 255    |
| Mean               | 71.268 |
| Median             | 61     |
| Standard deviation | 53.159 |

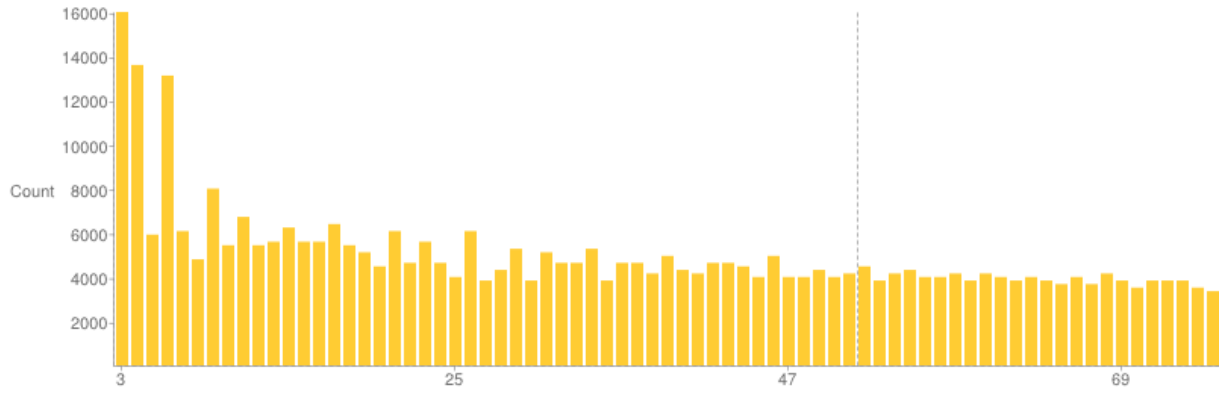

### Coverage:

|                    |        |
|--------------------|--------|
| Min                | 1      |
| Max                | 1,763  |
| Mean               | 12.855 |
| Median             | 11     |
| Standard deviation | 11.535 |

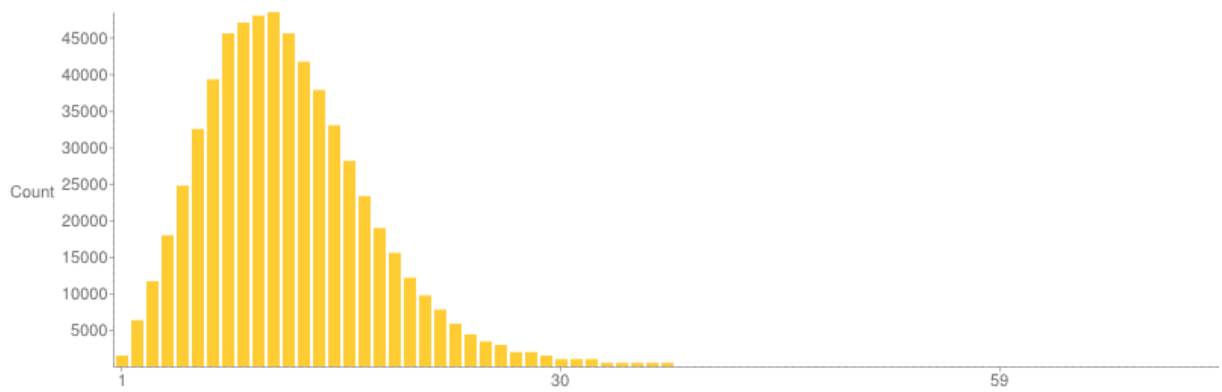

### Insertions and deletions length:

|                    |        |
|--------------------|--------|
| Min                | -43    |
| Max                | 27     |
| Mean               | -0.459 |
| Median             | -1     |
| Standard deviation | 5.022  |

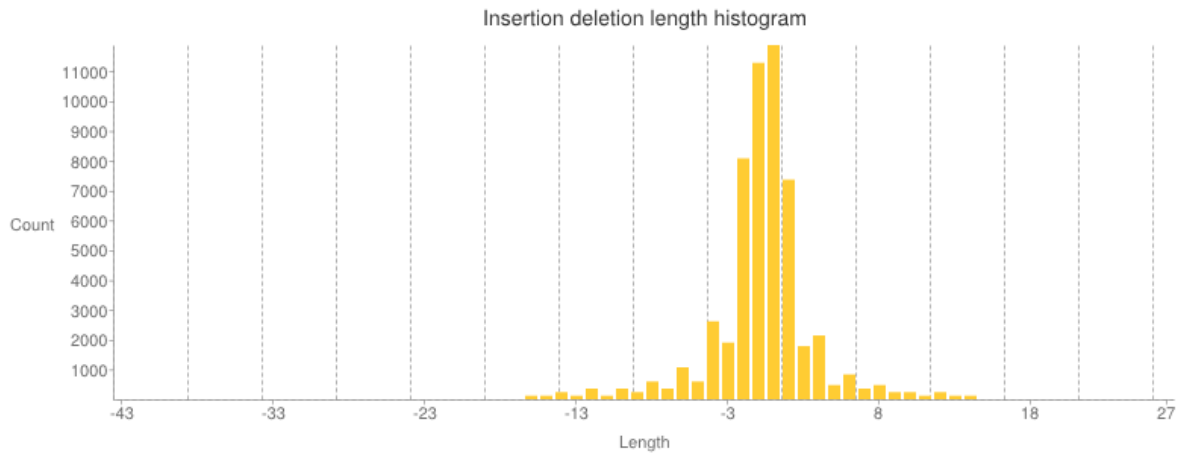

### Base changes (SNPs)

|   | A      | C      | G      | T      |
|---|--------|--------|--------|--------|
| A | 0      | 374726 | 205356 | 205356 |
| C | 374726 | 0      | 205356 | 205356 |
| G | 205356 | 205356 | 0      | 374726 |
| T | 205356 | 205356 | 374726 | 0      |

### Ts/Tv (transitions / transversions)

**Note:** Only SNPs are used for this statistic.

**Note:** This Ts/Tv ratio is a 'raw' ratio. Some people prefer to use a ratio of rates, not observed events. In that case, you need to multiply by 2.0 (since there are twice as many possible transitions than transversions, E[Ts/Tv] ratio is twice the ratio of events).

|               |        |
|---------------|--------|
| Transitions   | 374726 |
| Transversions | 205356 |
| Ts/Tv ratio   | 1.825  |

#### All variants:

```

Sample      : /Users/macpro/GenBioPeach/Sequences_DD_F8_GB/BAMS/combined_GB.bam      Total
Transitions : 374726  374726
Transversions : 205356  205356
Ts/Tv      : 1.825  1.825
  
```

#### Only known variants (i.e. the ones having a non-empty ID field):

No results available (empty input?)

### Frequency of alleles

Note: Number of times an allele appears once (singleton), twice (doubletons), etc.

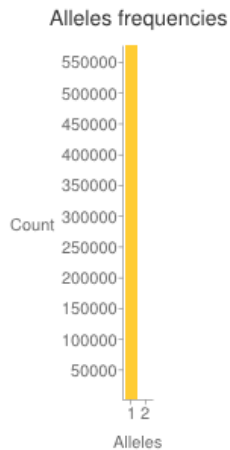

#### All variants:

|        |       |
|--------|-------|
| Min    | 1     |
| Max    | 2     |
| Mean   | 1.023 |
| Median | 1     |

|                    |            |
|--------------------|------------|
| Standard deviation | 0.00       |
| Values             | 12         |
| Count              | 8771601481 |

Only known variants (i.e. the ones having a non-empty ID field):

|                    |            |
|--------------------|------------|
| Min                | 2147483347 |
| Max                | 2147483348 |
| Mean               | 0          |
| Median             | 0          |
| Standard deviation | 0          |
| Values             |            |
| Count              |            |

### Codon changes

How to read this table:

- Rows are reference codons and columns are changed codons. E.g. Row 'AAA' column 'TAA' indicates how many 'AAA' codons have been replaced by 'TAA' codons.
- Red background colors indicate that more changes happened (heat-map).
- Diagonals are indicated using grey background color
- WARNING: This table may include different translation codon tables (e.g. mamalian DNA and mitochondrial DNA).

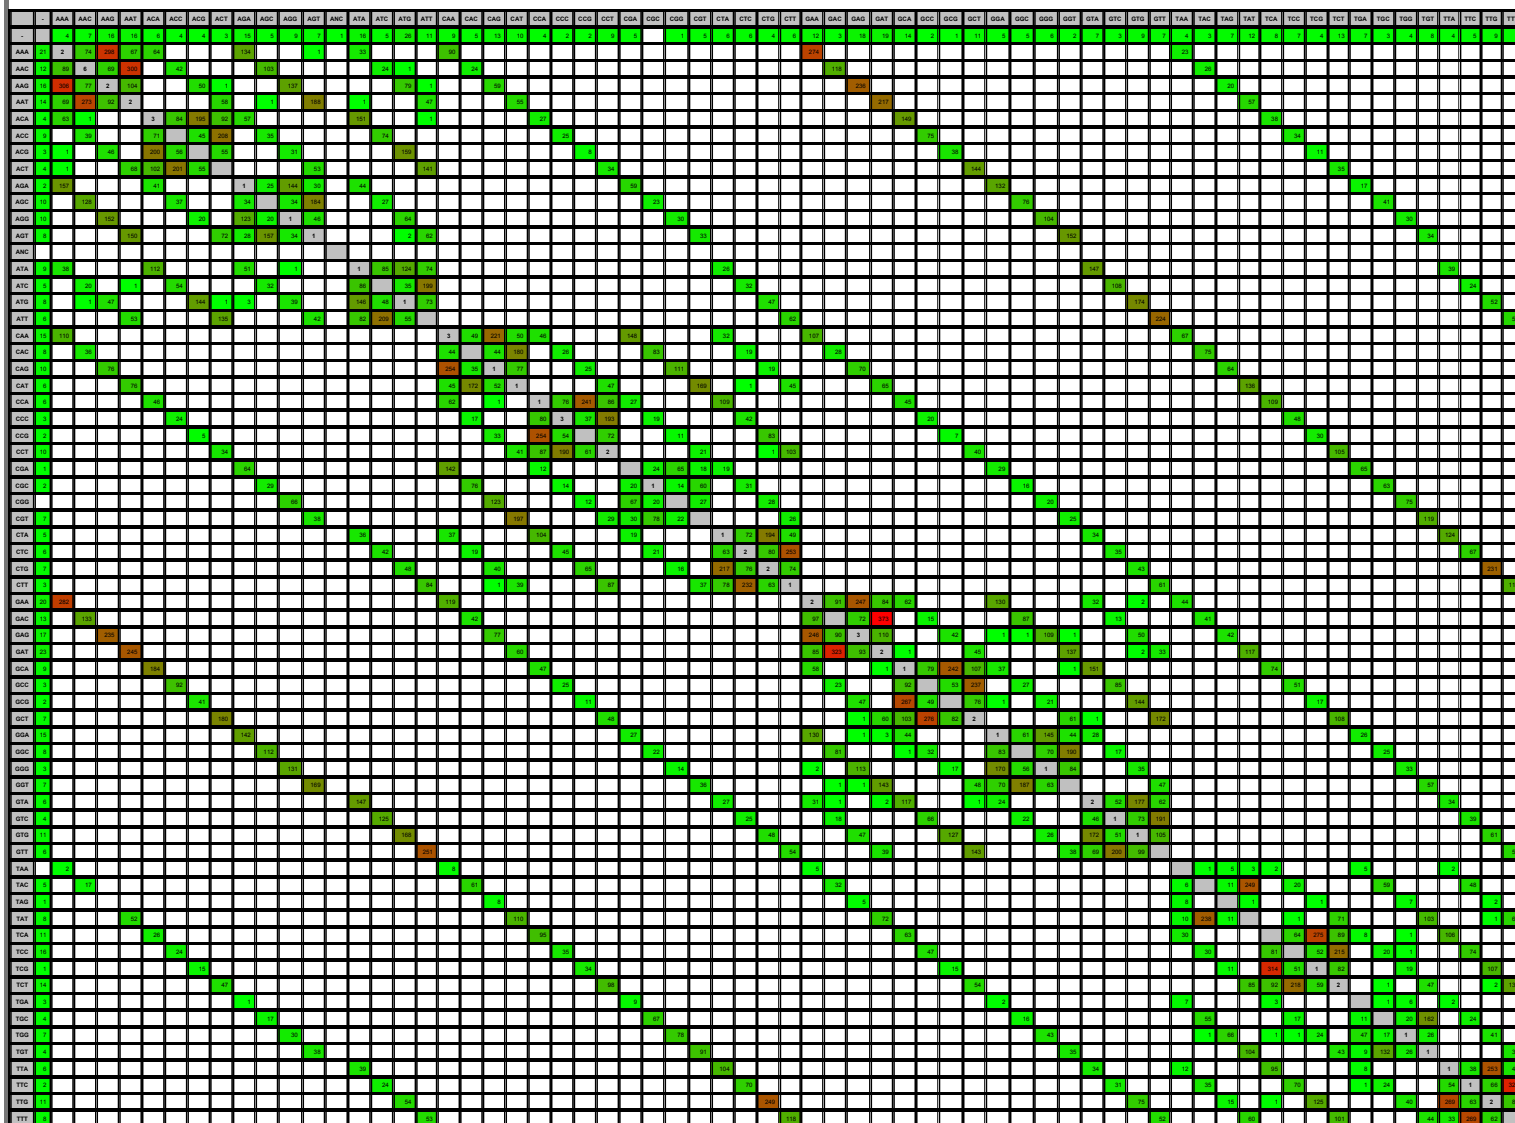

### Amino acid changes

How to read this table:

- Rows are reference amino acids and columns are changed amino acids. E.g. Row 'A' column 'E' indicates how many 'A' amino acids have been replaced by 'E' amino acids.
- Red background colors indicate that more changes happened (heat-map).
- Diagonals are indicated using grey background color
- WARNING: This table may include different translation codon tables (e.g. mamalian DNA and mitochondrial DNA).

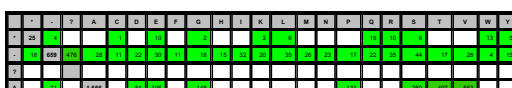



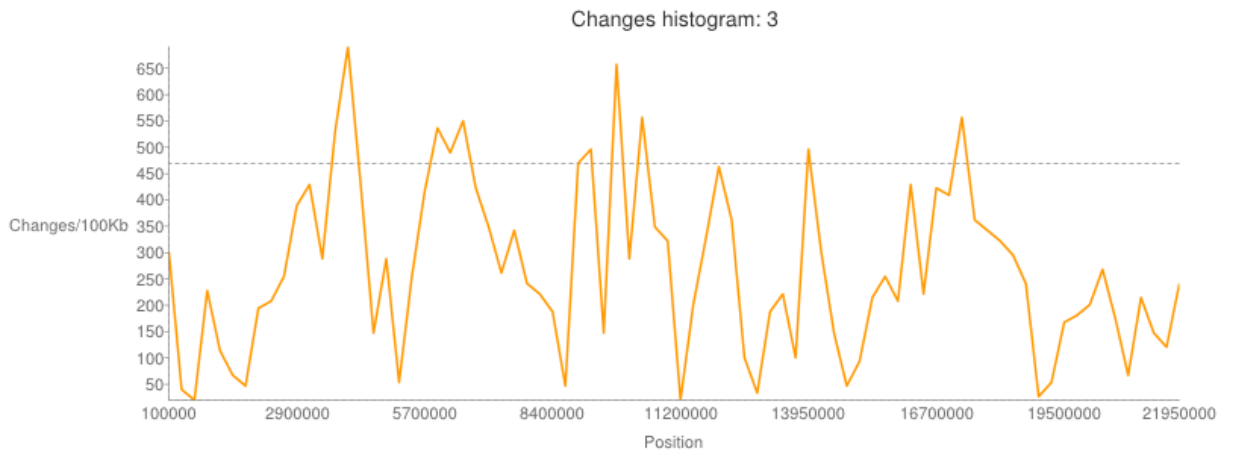

Chromosome: 3

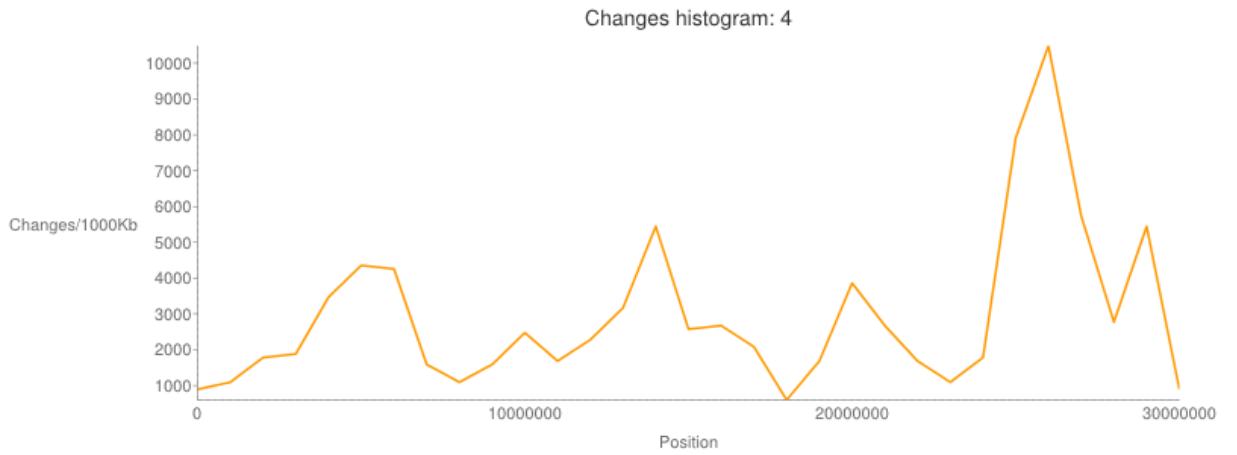

Chromosome: 4

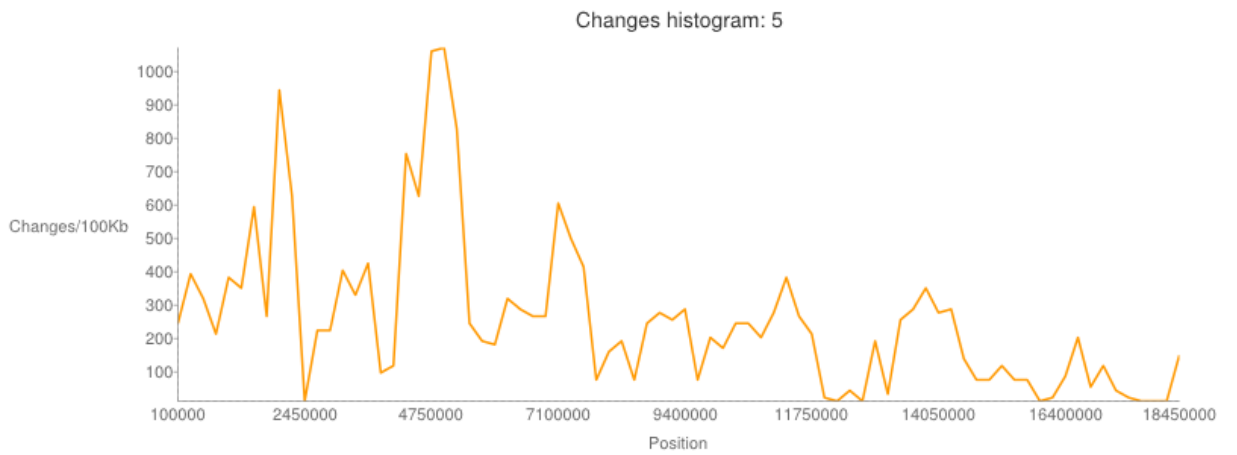

Chromosome: 5

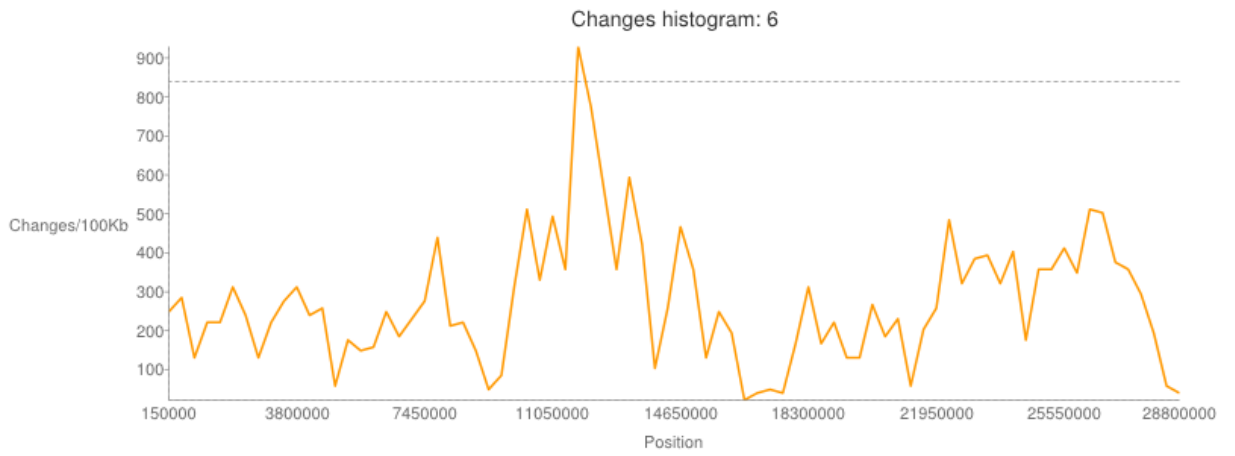

Chromosome: 6

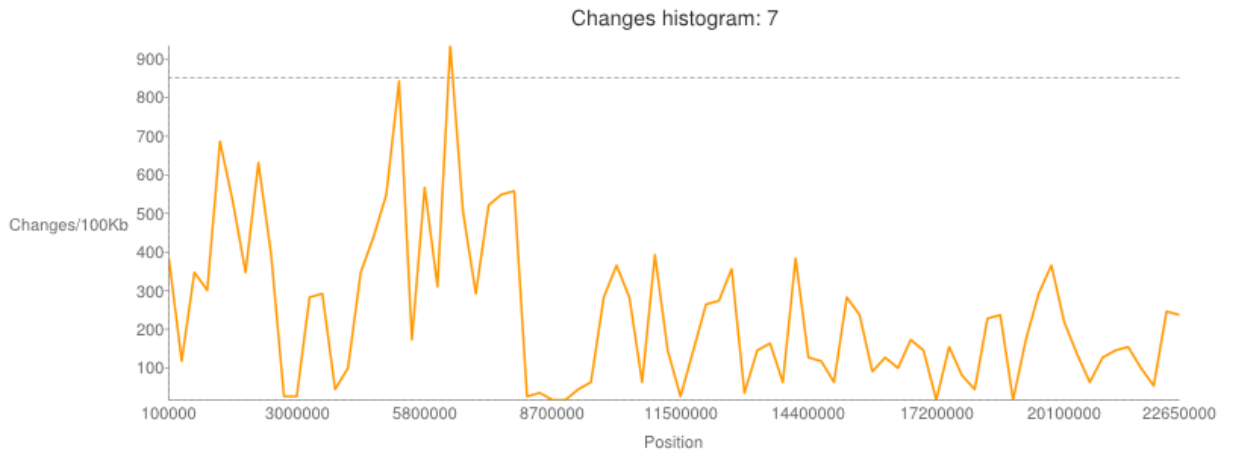

Chromosome: 7

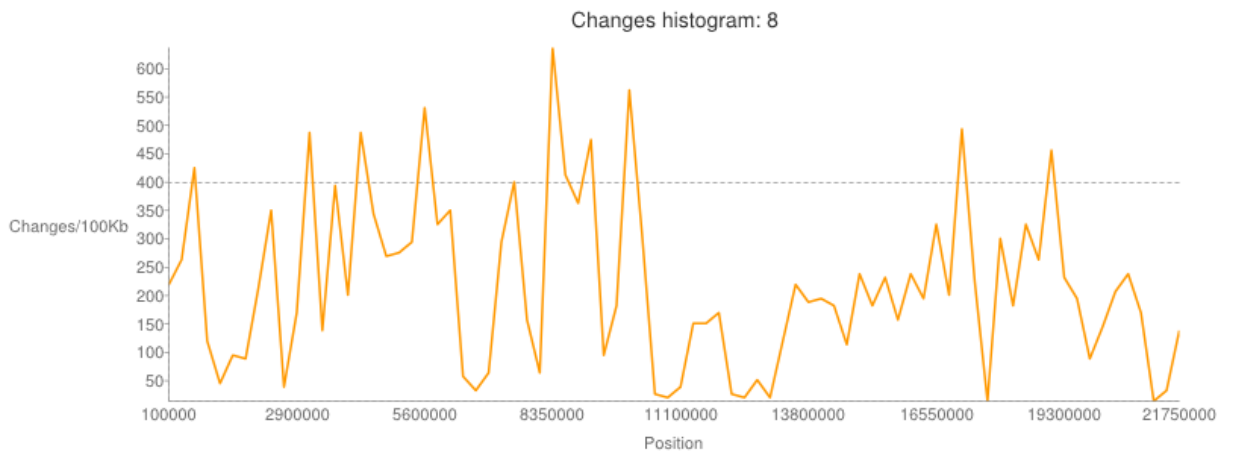

Chromosome: 8

**Details by gene**

[Here](#) you can find a tab-separated table.
